# Supplementary material
Source: Springer Nature journal article supplement (https://www.springermedizin.de/resource/supplementary/13075_2010_3038_MOESM1_ESM.pdf/9693394)

# A GFP transgenic rabbit

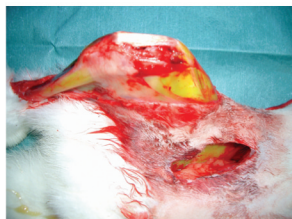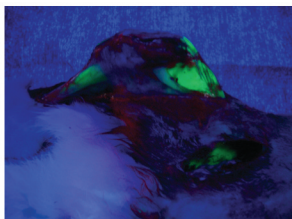

# B Crystal Violet

Colony-forming cells

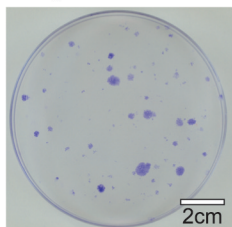

Bright field

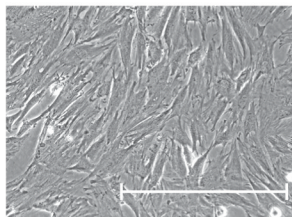

Fluorescence

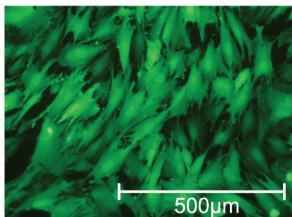

# C Chondrogenesis

Macro

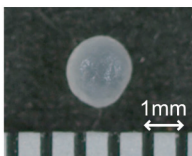

Toluidine Blue

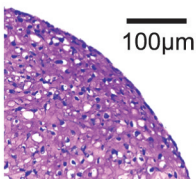

# Adipogenesis

Oil Red-O

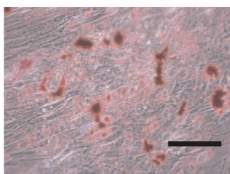

# Calcification

Alizarin Red

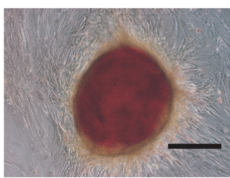

Supplement: MOESM1 [file 9693394]
